# Supplementary material for: Metabolic Biomarkers in Adults with Type 2 Diabetes: The Role of PPAR-γ2 and PPAR-β/δ Polymorphisms
Source: MDPI journal article supplement (doi:10.3390/biom13121791), 2023-12-14
Supplement: s1 [file s1]

**Supplementary Table S1.** Anthropometric and biochemical measures by PPAR genotypes (codominant model).

| Variable                    | PPAR- $\gamma$ 2 rs1801282    |                               |                                |          | PPAR- $\beta/\delta$ rs2016520 |                               |                                |          |
|-----------------------------|-------------------------------|-------------------------------|--------------------------------|----------|--------------------------------|-------------------------------|--------------------------------|----------|
|                             | CC (n=238)                    | CG (n=67)                     | GG (n=5)                       | <i>p</i> | TT (n=231)                     | TC (n=79)                     | CC (n=4)                       | <i>p</i> |
|                             | Md (IQR)                      | Md (IQR)                      | Md (IQR)                       |          | Md (IQR)                       | Md (IQR)                      | Md (IQR)                       |          |
| BMI (kg/m <sup>2</sup> )    | 31<br>(27-35)                 | 32<br>(28-34)                 | 29<br>(27-30)                  | 0.540    | 31<br>(27-35)                  | 32<br>(28-35)                 | 31<br>(28-33)                  | 0.423    |
| Waist circumference<br>(cm) | 101<br>(95-110)               | 106<br>(99-115)               | 102<br>(90-112)                | 0.072    | 100<br>(95-110)                | 104<br>(100-115)              | 98<br>(94-112)                 | 0.103    |
| FPG (mg/dL)                 | 144 <sup>a</sup><br>(114-179) | 157 <sup>b</sup><br>(128-207) | 106 <sup>ab</sup><br>(102-217) | 0.040    | 145<br>(117-177)               | 158<br>(124-199)              | 138<br>(131-145)               | 0.197    |
| HbA1c (%)                   | 7<br>(6-9)                    | 8<br>(6-10)                   | 8<br>(6-10)                    | 0.157    | 7<br>(6-9)                     | 8<br>(6-10)                   | 6<br>(6-7)                     | 0.063    |
| TG (mg/dL)                  | 177<br>(126-235)              | 178<br>(137-256)              | 218<br>(212-220)               | 0.490    | 174 <sup>a</sup><br>(124-227)  | 195 <sup>b</sup><br>(159-282) | 148 <sup>ab</sup><br>(110-232) | 0.046    |
| TC (mg/dL)                  | 194<br>(164-220)              | 189<br>(167-216)              | 197<br>(194-239)               | 0.656    | 193<br>(165-217)               | 189<br>(163-226)              | 197<br>(170-242)               | 0.778    |
| HDL-C (mg/dL)               | 44<br>(36-54)                 | 46<br>(38-55)                 | 51<br>(48-58)                  | 0.186    | 44<br>(37-54)                  | 47<br>(36-56)                 | 39<br>(38-46)                  | 0.548    |
| LDL-C (mg/dL)               | 110<br>(80-134)               | 101<br>(73-129)               | 94<br>(91-144)                 | 0.429    | 109<br>(79-132)                | 103<br>(64-139)               | 125<br>(94-165)                | 0.478    |

|                |               |               |               |       |                            |                            |                             |       |
|----------------|---------------|---------------|---------------|-------|----------------------------|----------------------------|-----------------------------|-------|
| VLDL (mg/dL)   | 35<br>(25-47) | 36<br>(27-51) | 44<br>(42-44) | 0.490 | 35 <sup>a</sup><br>(25-45) | 39 <sup>b</sup><br>(32-56) | 30 <sup>ab</sup><br>(22-46) | 0.046 |
| TC/HDL-C index | 4<br>(3-5)    | 4<br>(3-5)    | 4<br>(3-5)    | 0.465 | 4<br>(3-5)                 | 4<br>(3-5)                 | 5<br>(4-6)                  | 0.716 |

---

BMI (body mass index), FPG (fasting plasma glucose), TG (triglycerides), TC (total cholesterol), HDL-C (high-density lipoprotein), LDL-C (low-density lipoprotein), VLDL (very-low-density lipoprotein). Different letters in superscripts indicate statistical difference by Dunn's test after Kruskal Wallis test (<sup>a-b</sup>).

**Supplementary Table S2.** Multivariate analysis of the relation between PPARs polymorphisms and fasting plasma glucose (log mg/dL).

| Variable               | Dominant Model                                   |                  |                                |             | Over-dominant Model                              |                  |                                |              |
|------------------------|--------------------------------------------------|------------------|--------------------------------|-------------|--------------------------------------------------|------------------|--------------------------------|--------------|
|                        | PPAR- $\gamma$ 2 rs1801282 CC <i>vs.</i> CG + GG |                  |                                |             | PPAR- $\gamma$ 2 rs1801282 CC + GG <i>vs.</i> CG |                  |                                |              |
|                        | Model 1<br>n=294                                 | Model 2<br>n=294 | PPAR- $\beta/\delta$ rs2016520 |             | Model 1<br>n=294                                 | Model 2<br>n=294 | PPAR- $\beta/\delta$ rs2016520 |              |
|                        |                                                  |                  | TT                             | TC + CC     |                                                  |                  | TT + CC                        | TC           |
|                        |                                                  |                  | n=217                          | n=77        |                                                  |                  | n=219                          | n=75         |
| Beta                   | Beta                                             | Beta             | Beta                           | Beta        | Beta                                             | Beta             | Beta                           | Beta         |
| 95%CI                  | 95%CI                                            | 95%CI            | 95%CI                          | 95%CI       | 95%CI                                            | 95%CI            | 95%CI                          | 95%CI        |
| <i>p</i>               | <i>p</i>                                         | <i>p</i>         | <i>p</i>                       | <i>p</i>    | <i>p</i>                                         | <i>p</i>         | <i>p</i>                       | <i>p</i>     |
| PPAR- $\gamma$ 2       | 0.13*                                            | 0.06             | 0.06                           | 0.34        | 0.14 <sup>+</sup>                                | 0.07             | 0.08                           | 0.33         |
| rs1801282              | (0.04, 0.23)                                     | (-0.05, 0.17)    | (-0.04, 0.17)                  | (0.14-0.54) | (0.04, 0.24)                                     | (-0.04, 0.19)    | (-0.03, 0.19)                  | (0.13, 0.54) |
|                        | 0.007                                            | 0.260            | 0.246                          | 0.001       | 0.005                                            | 0.192            | 0.175                          | 0.002        |
| PPAR- $\beta/\delta$   | 0.09 <sup>#</sup>                                | 0.03             |                                |             | 0.09 <sup>‡</sup>                                | 0.03             |                                |              |
| rs2016520              | (0.00, 0.18)                                     | (-0.07, 0.13)    | --                             | --          | (0.01, 0.18)                                     | (-0.07, 0.14)    | --                             | --           |
|                        | 0.060                                            | 0.587            |                                |             | 0.055                                            | 0.521            |                                |              |
| PPAR- $\beta/\delta$ X |                                                  | 0.28             |                                |             |                                                  | 0.26             |                                |              |
| PPAR- $\gamma$ 2       | --                                               | (0.06, 0.50)     | --                             |             | ---                                              | (0.04, 0.48)     | --                             | --           |
|                        |                                                  | 0.013            |                                |             |                                                  | 0.020            |                                |              |

|                          |      |      |      |      |      |      |      |      |
|--------------------------|------|------|------|------|------|------|------|------|
| <i>Adj R<sup>2</sup></i> | 0.05 | 0.07 | 0.01 | 0.17 | 0.06 | 0.07 | 0.01 | 0.17 |
|--------------------------|------|------|------|------|------|------|------|------|

---

All models were adjusted for participants' age at the time of T2D diagnosis. \* Reference CC, #reference TT, +reference CC + GG, † reference TT + C
